# Supplementary material for: Labelling of [Leu5]-enkephalin with organometallic Mo complexes by solid-phase synthesisElectronic supplementary information (ESI) available: full analytical data for 2–4. See http://www.rsc.org/suppdata/cc/b2/b203128k/Abbreviations: HMBA = hydroxymethylbenzoic acid; 2-Cl-Trt = 2-chlorotrityl; TFA = trifluoroacetic acid; TIS = triisopropylsilane; TBTU = O-(1H-benzotriazol-1-yl)-N,N,N′,N′-tetramethyluronium tetrafluoroborate; Enk = leucine-enkephalin, [Leu5]-enkephalin; HOBt = hydroxybenzotriazole.
Source: Royal Society of Chemistry journal article supplement (doi:10.1039/b203128k), 2002-06-05
Supplement: b203128k.doc [file b203128k.doc]

**Supplementary Material (ESI) for Chemical Communications**

**This journal is © The Royal Society of Chemistry 2002**

**Labelling of [Leu5]-Enkephalin with organometallic Mo complexes by solid-phase synthesis**

**Dave R. van Staveren[a] and Nils Metzler-Nolte* [b]**

Corresponding author:

## N. Metzler-Nolte

## Pharmazeutisch-Chemisches Institut, Universität Heidelberg

## Im Neuenheimer Feld 364, D - 69120 Heidelberg (Germany)

## Fax: ++49 - (0)6221 - 54 64 41

## E-mail: Nils.Metzler-Nolte@urz.uni-heidelberg.de

**Abstract**

The neuropeptide leucine-enkephalin has been covalently labelled with the two organometallic Mo carbonyl complexes Mo(R-His)(Allyl)(CO)2 (His = *N, N, O*-*L*-histidinate) and Mo(R-bpa)(CO)3 (bpa = bis(2-picolyl)amine) on the resin as the last step of a solid-phase synthesis scheme and in solution.

Full analytical data for compounds **2**, **3** and **4**.

**2**:

C42H53N9O11Mo = 955.9 g mol-1. IR (KBr):  = 1930 (s), 1830 (s) CO, 1654 (br, vs) C=O; (MeOH):  = 1938, 1846 CO. MS (ESI-pos.; MeOH): *m/z* = 958 [M+H]+, 980 [M+Na]+; exact mass for the [M+Na]+ fragment: 980.2826; C42H53N9NaO11Mo requires 980.2817. 1H NMR (500.35 MHz; DMSO-d6):  = 9.19 / 9.15 (1H, s, Tyr-OH), 8.58 / 7.94 (CH), 8.26 (1H, m, NHGly), 8.24 / 8.19 (1H, br, NHTyr), 8.06 (1H, d, 3*J*HH = 8.0 Hz, NHPhe), 7.95 (2H, m, NHGly + NHLeu), 7.23 (4H, m, Ar-HPhe), 7.16 (1H, m, Ar-HPhe), 7.07 (1H, s, O=CNH2), 6.98 (2H, pseudo-d, Ar-HTyr), 6.93 (1H, br, O=CNH2), 6.91 / 6.76 (1H, s, C-HisH), 6.60 (2H, pseudo-t, Ar-HTyr), 4.70 / 3.90 (1H, br, His-NH2), 4.50 (1H, m, C-PheH), 4.47 (1H, m, C-TyrH), 4.23 / 4.06 (2H, m, NCH2), 4.19 (1H, m, C-LeuH), 4.09 / 3.93 (1H, br, His-NH2), 3.75-3.58 (4H, m, both Gly-CH2), 3.32 (1H, m, C-His H), 3.02 (1H, m, C-PheH), 2.91 (1H, m, C-TyrH), 2.80-2.73 (3H, overlapping m, C-PheH + C-HisH2), 2.67-2.50 (3H, overlapping m, C-TyrH + N-CH2C*H*2), 1.56 (1H, m, C-LeuH), 1.46 (2H, m, 2 C-LeuH), 0.87 (3H, d, 3*J*HH = 6.5 Hz, Leu-CH3), 0.81 (3H, d, 3*J*HH = 6.5 Hz, Leu-CH3), 3.52 / 3.48 (1H, m, Hc-allyl), 3.34 / 3.15 (Hs/a-allyl), 3.12 / 2.76 (1H, m, Hs/a-allyl), 1.20 (d, 3*J*HH = 9.2 Hz) / 0.79 (1H, Hs/a-allyl), 1.00 (d, 3*J*HH = 9.1 Hz) / 0.79 (1H, m, Hs/a-allyl). 13C NMR (125.8 MHz; MeOH-d4):  = 230.2, 228.3 (CO), 182.6 (C=OHis), 177.3, 174.6, 173.4, 172.5, 172.3, 171.9 (C=O), 157.3, 138.3, 131.3, 130.4, 129.6, 128.8, 127.9, 116.4 (CAr), 143.9 (C), 135.4 (C-His), 119.3 (C-His), 76.0 (Cc-allyl), 60.8 (C-allyl), 57.2, 56.6 (C-Phe + C-Tyr), 55.6 (C-allyl), 54.0 (C-His), 53.2 (C-Leu), 44.6 (N-*C*H2), 44.0, 43.7 (CH2-Gly), 41.7 (C-Leu), 38.4, 37.2 (C-Phe + C-Tyr), 37.8 (N-CH2-*C*H2), 29.5 (C-His), 25.8 (C-Leu), 23.6, 21.8 (Both Leu-CH3). Because the **a** / **b** ratio in MeOH-d4 is approximately 4:1, only resonances owing to isomer **a** were detected with certainty.

# 3:

# C48H55N9O7 = 870.0 g mol-1. MS (ESI-pos.; MeOH): *m/z* = 870 [M+H]+, 876 [M+Li]+, 892 [M+Na]+; exact mass of the [M+Li]+ fragment: 876.4380; C48H55LiN9O7 requires 876.4384. 1H NMR (500.35 MHz; CD3OD):  = 8.40 (2H, m, HPyr), 7.76 (2H, m, HPyr), 7.69 (2H, d, 3*J*HH = 8.2 Hz, HAr), 7.61 (2H, apparent-d, HPyr), 7.43 (2H, d, 3*J*HH = 8.2 Hz, HAr), 7.24 (2H, m, HPyr), 7.21 (4H, m, HAr-Phe), 7.14 (1H, m, HAr-Phe), 7.07 (2H, d, 3*J*HH = 8.4 Hz, HAr-Tyr), 6.79 (2H, d, 3*J*HH = 8.4 Hz, HAr-Tyr), 4.68 (1H, m, C-PheH or C-TyrH), 4.55 (1H, m, C-PheH or C-TyrH), 4.29 (1H, m, C-LeuH), 3.83 (2H, m, CH2-Gly), 3.78 (2H, m, CH2-Gly), 3.74 (4H, s, CH2-picolyl), 3.67 (2H, s, CH2-benzyl), 3.14 (2H, m, C-PheH + C-TyrH), 2.98 (2H, m, C-PheH + C-TyrH), 1.57 (3H, m, C-Leu + C-Leu), 0.85 (3H, d, 3*J*HH = 6.0 Hz, Leu-CH3), 0.81 (3H, d, 3JHH = 6.0 Hz, Leu-CH3). (No resonances owing to NH and Tyr-OH detected due to H / D exchange); (500.35 MHz; DMSO-d6):  = 8.48 (3H, m, NH + 2 HPyr), 8.27 (1H, br, NH), 8.08 (1H, d, 3*J*HH = 5.1 Hz, NH), 8.02 (1H, br, NH), 7.95 (1H, d, 3*J*HH = 7.6 Hz, NH), 7.78 (2H, m, HPyr), 7.75 (2H, apparent-d, HPyr), 7.56 (2H, d, 3*J*HH = 8.0 Hz, HAr), 7.46 (2H, d, 3*J*HH = 8.0 Hz, HAr), 7.25 (2H, m, HPyr), 7.22 (4H, m, HAr-Phe), 7.15 (1H, m, HAr-Phe), 7.09 (2H, d, 3*J*HH = 8.3 Hz, HAr-Tyr), 7.06 (1H, br, NH), 695 (1H, br, NH), 6.61 (2H, d, 3*J*HH = 8.3 Hz, HAr-Tyr), 4.60 (1H, m, C-PheH or C-TyrH), 4.49 (1H, m, C-PheH or C-TyrH), 4.19 (1H, m, C-LeuH), 3.73 (2H, m, CH2-Gly), 3.70 (4H, s, CH2-picolyl), 3.67 (2H, s, CH2-benzyl), 3.64 (2H, m, CH2-Gly), 3.02 (2H, m, C-PheH2 or C-TyrH2), 2.87 (1H, m, C-PheH or C-TyrH), 2.79 (1H, m, C-PheH or C-TyrH), 1.54 (1H, m, C-Leu), 0.85 (3H, d, 3*J*HH = 6.4 Hz, Leu-CH3), 0.80 (3H, d, 3*J*HH = 6.4 Hz, Leu-CH3); Tyr-OH not detected. 13C NMR (100.6 MHz; DMSO-d6):  = 177.2, 174.7, 173.3, 172.3, 171.9, 170.2 (C=O), 160.2, 157.4, 149.4, 144.2, 138.7, 138.2, 134.0, 131.4, 130.3, 130.0, 129.6, 129.0, 128.7, 127.9, 124.8, 123.9, 116.3 (CAr), 60.9 (CH2-picolyl), 59.4 (CH2-benzyl), 57.4, 56.6 (C-Phe + C-Tyr), 53.0 (C-Leu), 44.0, 43.7 (CH2-Gly), 41.6 (C-Leu), 38.3, 37.6 (C-Phe + C-Tyr), 25.7 (C-Leu), 23.5, 21.8 (both Leu-CH3).

**4**:

C51H55MoN9O10 = 1050.0 g mol-1. IR (KBr):  = 3394 (m), 3311 (m) NH, 1897 (vs), 1776 (vs), 1746 (s) CO, 1637 (br, s) C=O. MS (ESI-pos.; DMF): *m/z* = 1052 [M+H]+, 1074 [M+Na]+. 1H NMR (500.35 MHz; DMSO-d6):  = 9.13 (1H, s, Tyr-OH), 8.67 (2H, pseudo-d, HPyr), 8.60 (1H, d, 3*J*HH = 8.2 Hz, NHTyr or NHPhe), 8.30 (1H, pseudo-t, NHGly), 8.59 (1H, d, 3*J*HH = 8.1 Hz, NHTyr or NHPhe), 8.05 (1H, pseudo-t, NHGly), 7.94 (1H, d, 3*J*HH = 8.3 Hz, NHLeu), 7.89 (2H, d, 3*J*HH = 8.2 Hz, HAr), 7.64 (2H, d, 3*J*HH = 8.2 Hz, HAr), 7.57 (2H, m, HPyr), 7.24 (4H, m, HAr-Phe), 7.17-7.09 (8H, overlapping m, 1HAr-Phe + 2HAr-Tyr + 4HPyr + 1H NH2), 6.94 (1H, br, NH2), 6.64 (2H, d, 3*J*HH = 8.5 Hz, HAr-Tyr), 4.70 (2H, s, CH2-benzyl), 4.68 (1H, m, C.-PheH or C.-TyrH), 4.66 (2H, d, 2*J*HH = 15.5 Hz, CH2-picolyl), 4.51 (1H, m, C.-PheH or C.-TyrH), 4.17 (1H, m, C.-LeuH), 3.76 (2H, m, CH2-Gly), 3.74 (2H, d, 2*J*HH = 15.5 Hz, CH2-picolyl), 3.67 (2H, m, CH2-Gly), 3.05 (2H, m, C-PheH2 or C-TyrH2), 2.91 (1H, m, C-PheH or C-TyrH), 2.79 (1H, m, C-PheH or C-TyrH), 1.55 (1H, m, C-LeuH), 1.46 (2H, m, C-LeuH2), 0.87 (3H, d, 3*J*HH = 6.5 Hz, Leu-CH3), 0.82 (3H, d, 3JHH = 6.5 Hz, Leu-CH3). 13C NMR (100.6 MHz; DMSO-d6):  = 231.2, 230.3 (CO), 173.8, 171.9, 170.6, 169.0, 168.6, 165.9 (C=O), 158.8 (2), 155.6, 150.0, 137.7, 137.5, 135.4, 134.0, 131.3, 130.0, 129.1, 128.4, 128.0, 127.4, 126.2, 123.0, 122.3, 114.9 (CAr), 68.9 (CH2-benzyl), 64.1 (CH2-picolyl), 55.2, 54.0 (C-Phe + C-Tyr), 51.0 (C-Leu), 42.1, 41.9 (CH2-Gly), 40.8 (C-Leu), 37.3, 36.2 (C-Phe + C-Tyr), 24.1 (C-Leu), 22.9, 21.6 (both Leu-CH3).
